# Supplementary material
Source: PubMed Central journal article supplement (PMC6276114)
Supplement: NIHMS998080-supplement-1.pdf [file NIHMS998080-supplement-1.pdf]

1  
2  
3  
4  
5  
6  
7  
8  
9  
10  
11  
12  
13  
14  
15  
16  
17  
18  
19  
20  
21  
22  
23  
24  
25  
26  
27  
28

## Supplementary Materials

### Brief Report

#### Immunoregulation of Theiler's virus-induced demyelinating disease by Glatiramer Acetate without Suppression of Anti-Viral Immune Responses

29  
30  
31  
32  
33  
34  
35  
36  
37  
38  
39  
40

Seiichi Omura, Ph.D.<sup>1,2,5,\*</sup>, Fumitaka Sato, Ph.D.<sup>1,2,5,\*</sup>, Nicholas E. Martinez, Ph.D., M.B.A.<sup>1,2</sup>,  
Tierra Range<sup>1,2</sup>, Lesya Ekshyyan<sup>1,2</sup>, Alireza Minagar, M.D.<sup>3</sup>,  
J. Steven Alexander, Ph.D.<sup>3,4</sup>, and Ikuo Tsunoda, M.D., Ph.D.<sup>1,2,3,5,#</sup>

<sup>1</sup> Department of Microbiology and Immunology

<sup>2</sup> Center for Molecular and Tumor Virology

<sup>3</sup> Department of Neurology

<sup>4</sup> Department of Molecular and Cellular Physiology

Louisiana State University Health Sciences Center-Shreveport

1501 Kings Highway, Shreveport, LA 71130, USA

<sup>5</sup> Department of Microbiology

Kindai University Faculty of Medicine

377-2 Ohnohigashi, Osakasayama, Osaka 589-8511, Japan

\*Drs. Omura and Sato contributed equally.

#Corresponding author:

Ikuo Tsunoda, M.D., Ph.D.

Department of Microbiology

Kindai University Faculty of Medicine

377-2 Ohnohigashi, Osakasayama, Osaka 589-8511, Japan

Tel: +81-72-366-0221

Fax: +81-72-367-3606

E-mail: itsunoda@med.kindai.ac.jp

## 1 **Materials and Methods**

### 2 **Animal experiments**

3 Female 5-week-old SJL/J mice (Jackson Laboratory, Bar Harbor, ME) were infected intracerebrally with  $2 \times$   
4  $10^5$  plaque forming units (PFUs) of the Daniels (DA) strain of Theiler's murine encephalomyelitis virus  
5 (TMEV), as described previously [1]. TMEV-infected mice received intraperitoneal injections daily with a  
6 low (0.15 mg/mouse) or high dose (2 mg/mouse) of glatiramer acetate (GA, Teva Pharmaceuticals, Petach  
7 Tikva, Israel) for 4 weeks (days 0 to 27, Whole) or during the acute (days 0 to 6, Early) or chronic phase (days  
8 21 to 27, Late) of TMEV infection. All TMEV-infected (4-6 mice per group) mice were monitored daily and  
9 euthanized 5 to 6 weeks post infection (p.i.). The two doses of GA used in this study, 0.15 mg/mouse and 2  
10 mg/mouse, were two standard doses that have been widely used in previously published reports investigating  
11 the efficacy of GA in experimental autoimmune encephalomyelitis (EAE) [2]. The treatment schedule and the  
12 timing of euthanasia were based on our previous manuscripts on TMEV-induced demyelinating disease  
13 (TMEV-IDD) with various immunomodulatory treatments [3]. The control groups included TMEV-infected  
14 mice without GA treatment (TMEV alone group) and GA-treated mice without TMEV infection. Mice were  
15 maintained under specific pathogen-free conditions in our animal care facility.

16 Since TMEV-infected mice do not show obvious clinical signs until the late chronic phase, we  
17 evaluated the clinical signs of TMEV-infected mice using impaired righting reflex scores; the proximal end of  
18 the mouse's tail was grasped and twisted to the right and then to the left (0, a healthy mouse resists being turn  
19 over; 1, the mouse is flipped onto its back but immediately rights itself on one side; 1.5, the mouse is flipped  
20 onto its back but immediately rights itself on both sides; 2, the mouse rights itself in 1 to 5 seconds; 3, righting  
21 takes more than 5 seconds; and 4, the mouse cannot right itself) [4]. Positive impaired righting scores reflect  
22 polioencephalitis in the brain during the acute phase and inflammatory demyelination in the spinal cord during  
23 the chronic phase.

24

### 25 **Immunohistochemistry**

26 TMEV-infected mice were perfused with phosphate-buffered saline (PBS) followed by a 4%  
27 paraformaldehyde (PFA, Sigma-Aldrich, St. Louis, MO) solution in PBS. After the PFA fixation, the spinal  
28 cord was harvested, divided into 10 to 12 transversal segments, and embedded in paraffin. The spinal cord  
29 tissues were sliced at 4  $\mu\text{m}$ -thick using an HM 325 Rotary Microtome (Thermo Fisher Scientific Inc.,  
30 Waltham, MA). TMEV antigens in spinal cord sections were visualized by immunohistochemistry with  
31 hyperimmune serum against TMEV [4] using a Histofine MAX-PO kit (Nichirei Biosciences, Tokyo, Japan)  
32 [5]. The numbers of TMEV antigen-positive cells were counted under a light microscope [6].

33

### 34 **Lymphoproliferative assays**

35 Mononuclear cells (MNCs) were isolated from the spleen of TMEV-infected mice using Histopaque<sup>®</sup>-1083  
36 (Sigma-Aldrich) [7]. MNCs were cultured in RPMI 1640 medium (Mediatech, Inc., Manassas, VA)  
37 supplemented with 10% fetal bovine serum (FBS) (Mediatech), 2 mM L-glutamine (Mediatech), 50  $\mu\text{M}$   $\beta$ -  
38 mercaptoethanol (Sigma-Aldrich), and 1% antibiotic-antimycotic solution (Mediatech), at  $2 \times 10^5$  cells/well in  
39 96-well plates (Corning, Inc., Corning, NY). We stimulated MNCs with  $2 \times 10^5$  cells/well of TMEV-infected  
40 antigen presenting cells (TMEV-APCs) or mock-infected antigen presenting cells (mock-APCs), or 50  $\mu\text{g}/\text{ml}$   
41 of GA in the presence or absence of anti-CD4 [GK1.5, American Type Culture Collection, (ATCC), Manassas,

1 VA] or anti-CD8 (Lyt2.43, ATCC) antibody for 5 days [7]. The concentration of GA was based on previously  
2 published manuscripts on GA as well as our standard antigen-specific lymphoproliferation assay protocol [8].  
3 TMEV-APCs were made from whole spleen cells infected *in vitro* with TMEV at a multiplicity of infection  
4 (MOI) of 1, while mock-APCs were made from mock-infected spleen cells. Both TMEV-APCs and mock-  
5 APCs were incubated overnight and irradiated with 2,000 rads using a <sup>137</sup>Cs irradiator (J.L. Shepherd &  
6 Associates, San Fernando, CA). To assess the levels of lymphoproliferative responses, [<sup>3</sup>H]thymidine  
7 (PerkinElmer, Inc., Waltham, MA) was added to the culture at the concentration of 1 μCi/well for the last 24  
8 hours. MNCs were harvested on Reeves Angel 934AH filters (Brandel, Gaithersburg, MD) using a PHD<sup>TM</sup>  
9 Harvester 200A (Brandel). The incorporated radioactivity was measured using a Wallac 1409 Liquid  
10 Scintillation Counter (PerkinElmer). All cultures were performed in triplicate and the data were expressed as  
11 Δcpm (experimental cpm in TMEV-APCs or GA stimulation – control cpm in mock-APCs or no stimulation).  
12

### 13 **Enzyme-linked immunosorbent assays (ELISAs)**

14 We collected blood from the heart of TMEV-infected mice 5 to 6 weeks p.i. The levels of serum anti-TMEV  
15 or anti-GA antibodies were assessed by ELISAs, as described previously [9, 10]. We coated 96-well flat-  
16 bottom Nunc-Immuno plates (Thermo Fisher Scientific) with 10 μg/ml of TMEV antigen or GA. Serial  
17 dilutions of sera were added to the plates followed by a peroxidase-conjugated anti-mouse IgG1 or IgG2c  
18 antibody (Thermo Fisher Scientific). Immunoreactive complexes were detected with *o*-phenyldiamine  
19 dihydrochloride (Sigma-Aldrich) and absorbances were read at 492 nm on a Multiskan MCC/340 Microplate  
20 Reader (Thermo Fisher Scientific).

21 For cytokine assays, MNCs isolated from the spleen of TMEV-infected mice were cultured at  $8 \times 10^6$   
22 cells/well in 6-well-plates (Corning) and stimulated with 5 μg/ml of concanavalin A (ConA) or 50 μg/ml of  
23 GA for 2 days. The concentrations of interleukin (IL)-10 (BD Biosciences, San Diego, CA), IL-4 (BD  
24 Biosciences), interferon (IFN)-γ (BD Biosciences), and IL-17A (BioLegend, San Diego, CA) in the culture  
25 supernatants were quantified using ELISA kits, according to the manufacturer's instructions [7].  
26

### 27 **Real-time polymerase chain reaction (PCR)**

28 TMEV-infected mice were perfused with PBS. The spinal cord was harvested, frozen with liquid nitrogen,  
29 and homogenized in TRI Reagent<sup>®</sup> (Molecular Research Center, Inc., Cincinnati, OH) [11]. The total RNA  
30 was isolated from the homogenates using RNeasy<sup>®</sup> Mini Kits (Qiagen, Inc., Valencia, CA), according to the  
31 manufacturer's instruction. We reverse-transcribed 1 μg of the total RNA into cDNA using the ImProm-II<sup>TM</sup>  
32 Reverse Transcription System (Promega, Corp., Madison, WI), and then conducted real-time PCR with 50 ng  
33 of the cDNA using an RT<sup>2</sup> Fast SYBR<sup>®</sup> Green qPCR Master Mix (SABiosciences, Valencia, CA) and the  
34 MyiQ2 Two-Color Real-time PCR Detection System (Bio-Rad, Hercules, CA). To determine gene expression  
35 related to regulatory T cells (Tregs) and T helper (Th) 17 cells, we used the following primer pairs (Real Time  
36 Primers, LLC, Elkins Park, PA): *Foxp3*, forward (5'-GCTGGAGCTGGAAAAGGAGA-3') and reverse (5'-  
37 GTGGCTACGATGCAGCAAGA-3'); and *Il17a*, forward (5'-CGCAAACATGAGTCCAGGGAGAGC-3')  
38 and reverse (5'-TCAGGGTCTTCATTGCGGTGGAG-3') [12]. We also used the following primer pair as a  
39 housekeeping gene for normalization; phosphoglycerate kinase 1 (*Pgk1*), forward (5'-  
40 GCAGATTGTTTGAATGGTC-3') and reverse (5'-TGCTCACATGGCTGACTTTA-3').  
41

1 **Statistical analyses**

2 To determine statistical differences, the Kruskal-Wallis test and analysis of variance (ANOVA) were  
3 conducted for nonparametric data and parametric data using the OriginPro 8.1 (OriginLab Corporation,  
4 Northampton, MA). Data are shown as mean + standard error of the mean (SEM).

5

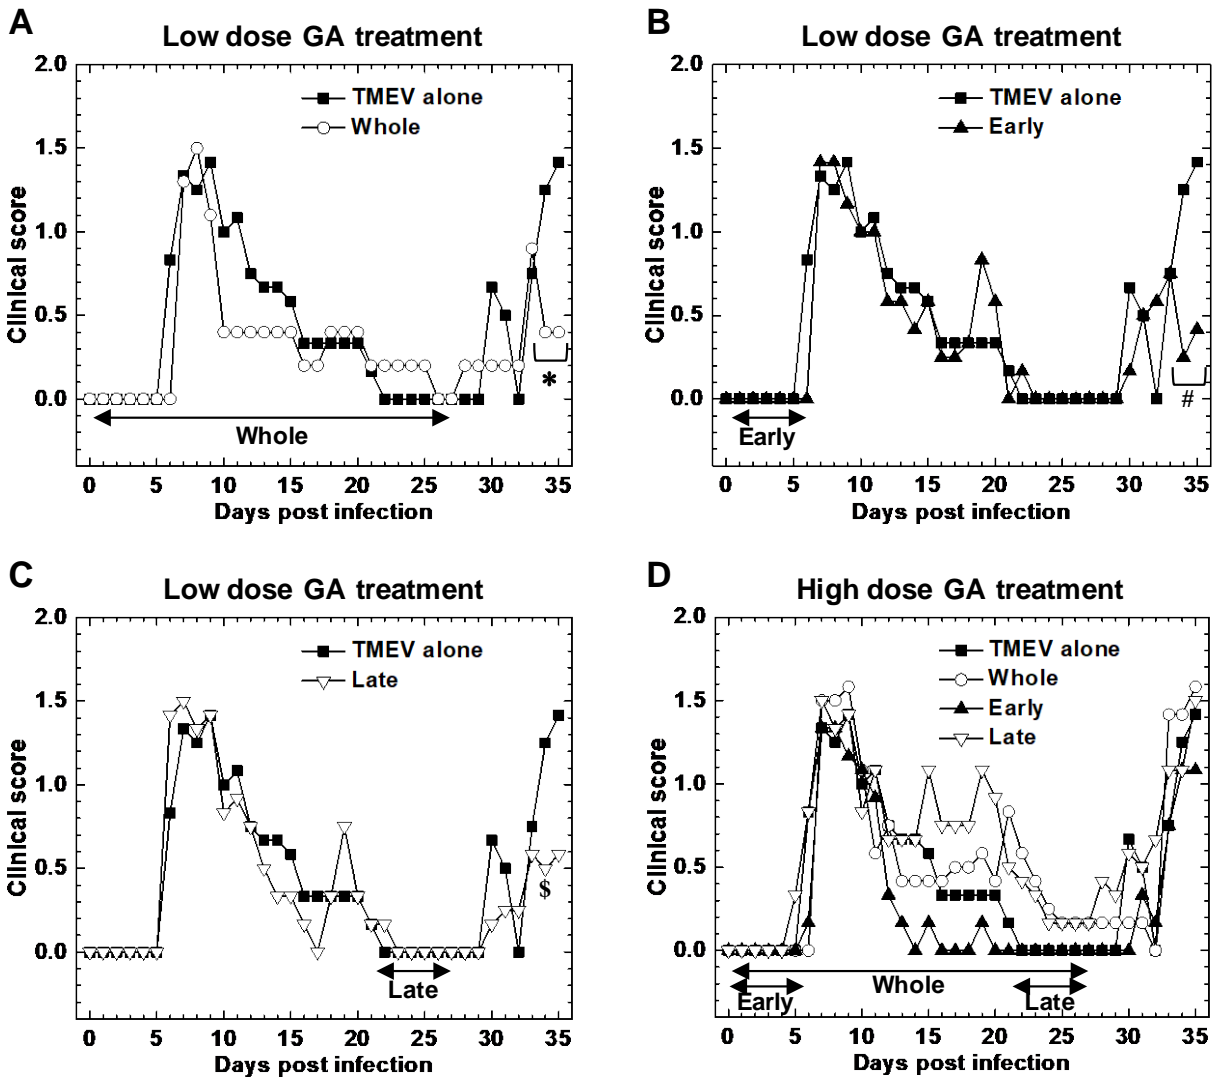

1  
2  
3  
4  
5  
6  
7  
8  
9  
10  
11  
12  
13  
14  
15  
16  
17

**Supplementary Fig. 1.** Modulation of clinical signs by glatiramer acetate (GA) treatment in a viral model of multiple sclerosis (MS), Theiler's murine encephalomyelitis virus-induced demyelinating disease (TMEV-IDD). (A-D) Mice were infected with TMEV on day 0 and treated daily with GA for 4 weeks (days 0 to 27, Whole, ○), during the acute phase (days 0 to 6, Early, ▲), or during the chronic phase (days 21 to 27, Late, ▽) of TMEV infection. Control mice had TMEV infection without GA treatment (TMEV alone, ■). The clinical scores of TMEV-IDD were evaluated by impaired righting reflex scores. Results are representative of two independent experiments, which were conducted in a blind fashion, and expressed as mean clinical scores. Each experiment was composed of five to six mice per group. (A-C) Low dose treatment (0.15 mg/mouse) of GA.  $P < 0.05$ , Mann-Whitney  $U$  test. (D) High dose GA treatment (2 mg/mouse). Note: since the Late group did not have GA treatment until day 21 post infection (p.i.), the Late group received only TMEV till day 20 p.i. Here, the clinical scores in the Late group should be similar to those in the TMEV alone group; the clinical differences between these two groups till day 20 p.i. must be interpreted as variation within mice receiving TMEV alone. Till day 20 p.i., the Whole group showed a similar clinical course to the control TMEV alone and Late groups. In contrast, the Early group tended to recover earlier than the other groups

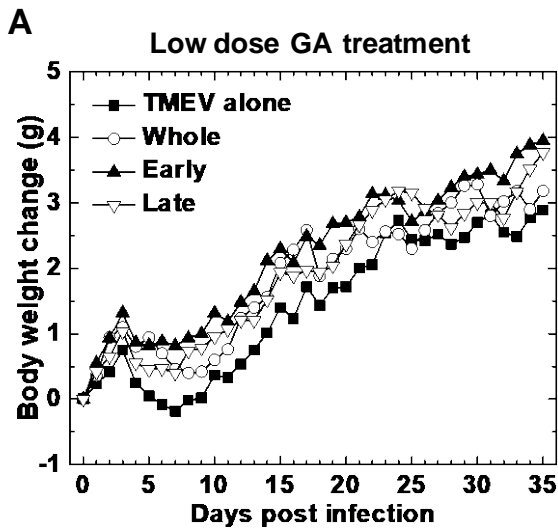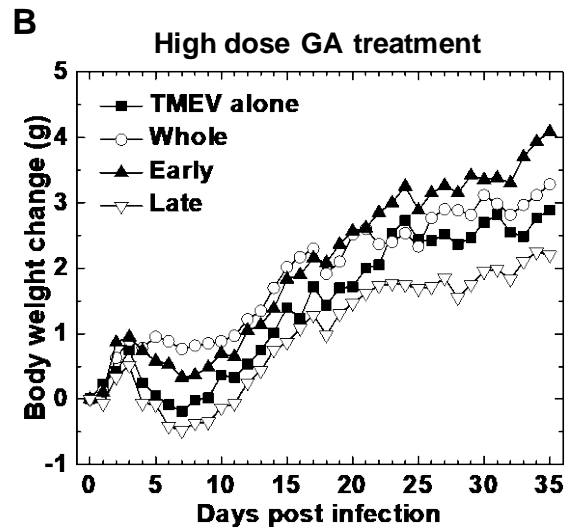

1

2

3 **Supplementary Fig. 2.** Effects of GA treatment on body weight changes after TMEV infection. Low dose  
 4 treatment (**A**) and high dose treatment (**B**) of GA. TMEV alone (■), Whole (○), Early (▲), and Late (▽).  
 5 Body weight changes were monitored daily. Results are representative of two independent experiments and  
 6 expressed as mean body weight changes. Each experiment was composed of five to six mice per group

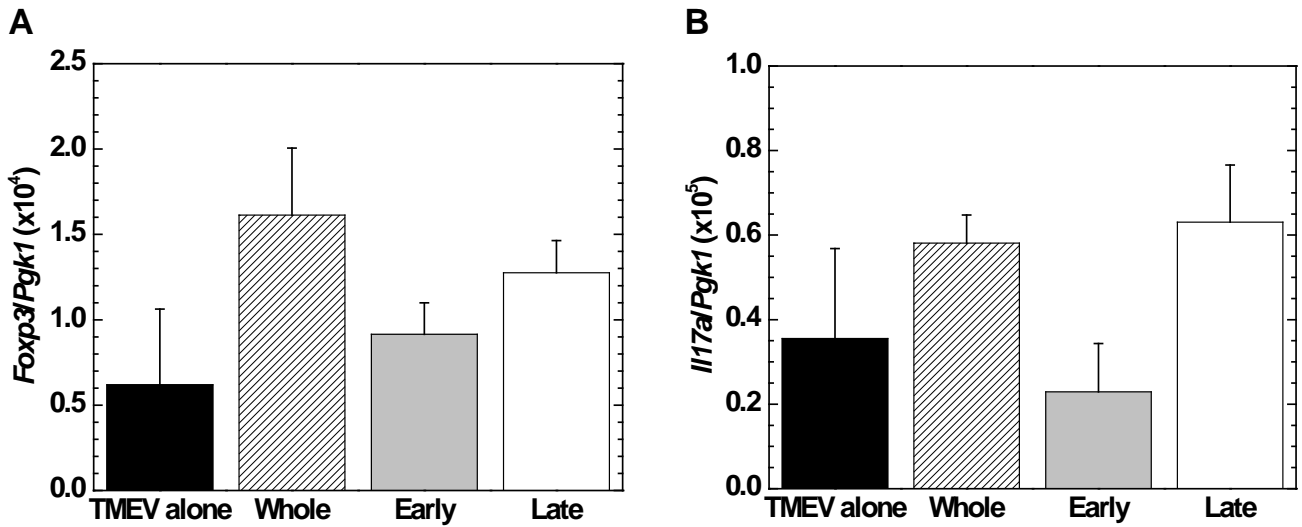

1  
2  
3  
4  
5  
6  
7  
8  
9

**Supplementary Fig. 3.** Effects of GA on forkhead box P3 (*Foxp3*) and interleukin (IL)-17A (*Il17a*) expression in the central nervous system (CNS). Real-time PCR analyses of *Foxp3* [regulatory T cell (Treg) marker, **A**] and *Il17a* [T helper (Th) 17 cell marker, **B**] in the spinal cord from control and GA-treated mice, 5 to 6 weeks p.i. Phosphoglycerate kinase 1 (*Pgk1*) expression was used as a housekeeping gene for normalization. Results are the averages expressed as mean expression levels + standard error of the mean (SEM). Each group was composed of three to four mice

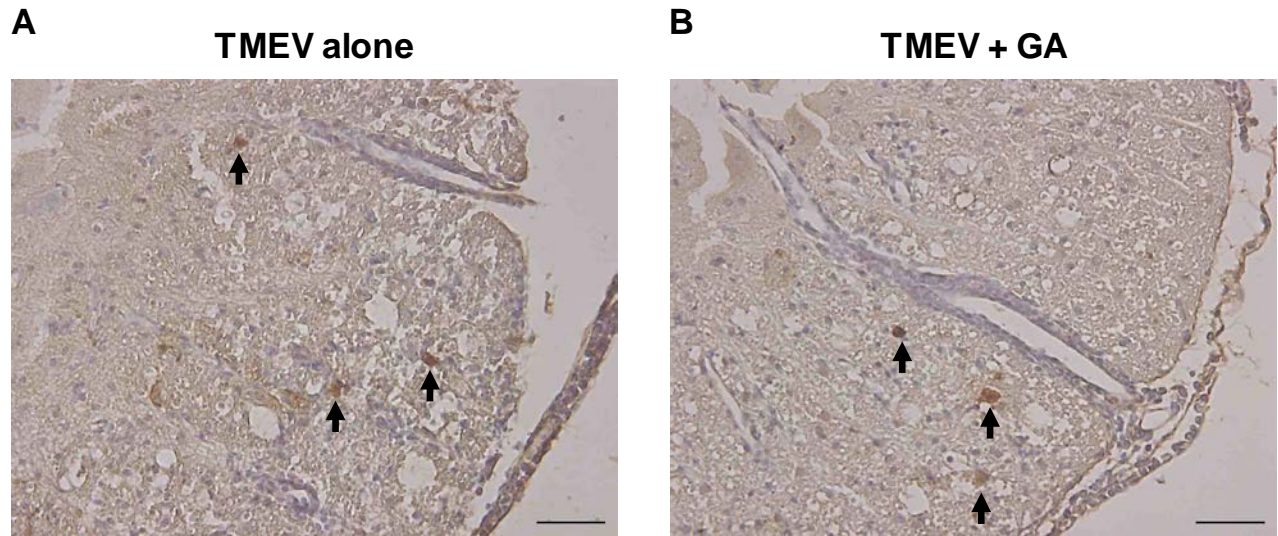

1  
2  
3  
4  
5  
6  
7  
8

**Supplementary Fig. 4.** Effects of GA on viral persistence in the CNS. Immunohistochemistry with hyperimmune serum against TMEV in the spinal cord from control (TMEV alone, **A**) and GA-treated (TMEV + GA, **B**) mice, 5 to 6 weeks p.i. Arrows indicate TMEV antigen-positive cells. Tissue sections are from the TMEV alone and Late groups, whose location of viral antigen was similar to those in the Early and Whole groups, and representative of two independent experiments. Scale bar = 50  $\mu$ m



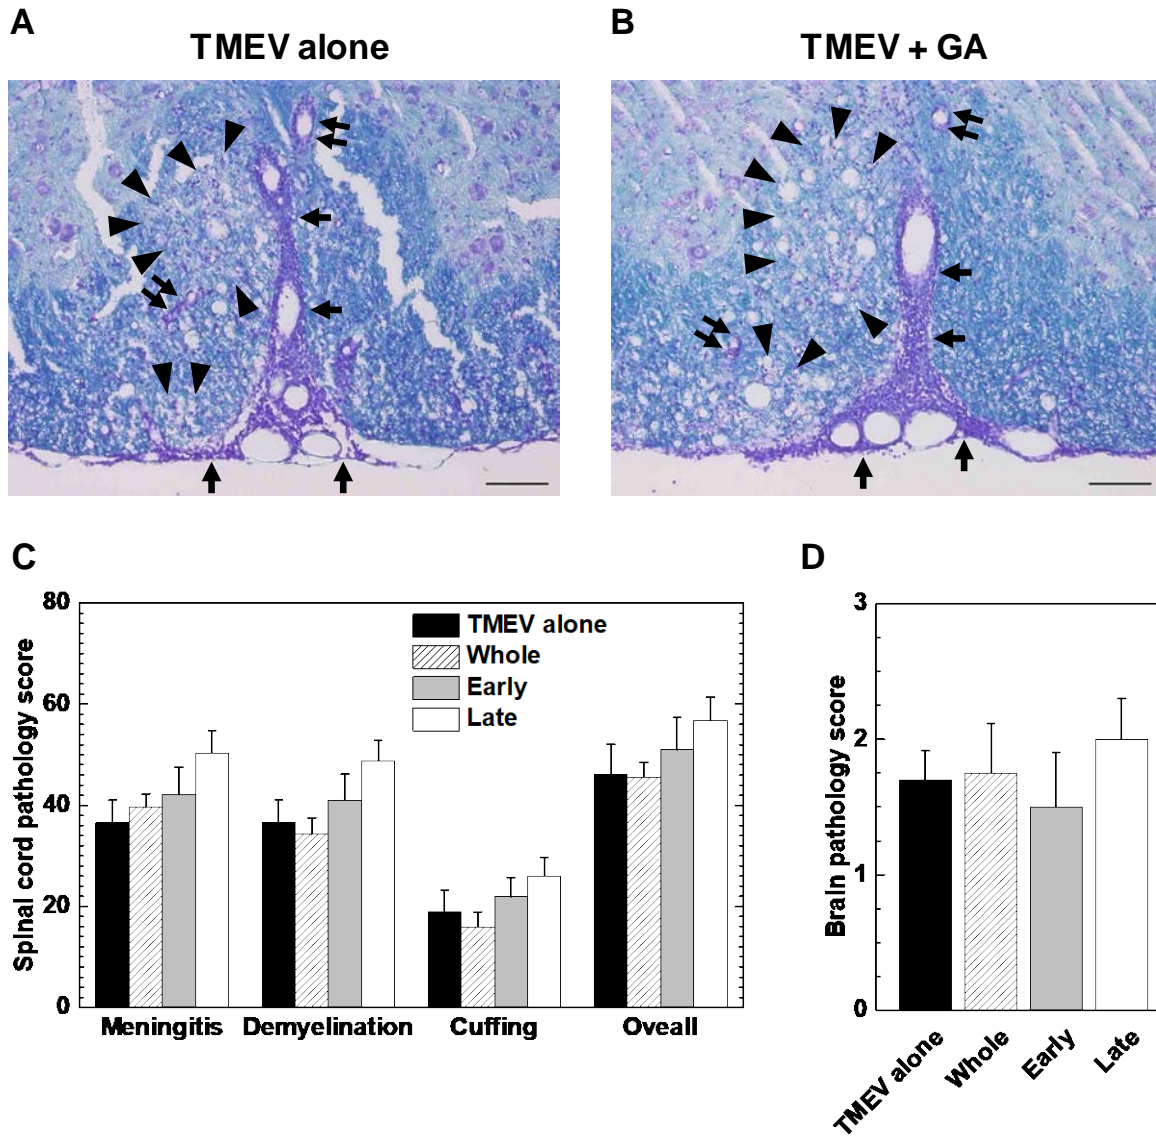

1  
 2  
 3 **Supplementary Fig. 5.** Effects of GA on neuropathology in control and GA-treated mice. (A, B) Luxol fast  
 4 blue staining. Arrowheads, arrows, and paired arrows indicate demyelination, meningitis, and perivascular  
 5 cuffing in the ventral funiculus of the spinal cord from control (TMEV alone, A) and GA-treated (TMEV +  
 6 GA, B) mice, 5 to 6 weeks p.i. Tissue sections are from the TMEV alone and Late groups, whose  
 7 neuropathology was similar to those in the Early and Whole groups, and representative of two independent  
 8 experiments. Scale bar = 100  $\mu$ m. (C, D) Spinal cord (C) and brain (D) pathology scores among the four  
 9 groups. Results are the averages of two independent experiments expressed as the mean + SEM. Each  
 10 experiment included four to six mice per group  
 11

## References

1. Tsunoda I, Kuang L-Q, Libbey JE, Fujinami RS (2003) Axonal injury heralds virus-induced demyelination. *Am J Pathol* 162:1259-1269
2. Aharoni R, Herschkovitz A, Eilam R, Blumberg-Hazan M, Sela M, Bruck W, Arnon R (2008) Demyelination arrest and remyelination induced by glatiramer acetate treatment of experimental autoimmune encephalomyelitis. *Proc Natl Acad Sci U S A* 105:11358-11363
3. Tsunoda I, Tanaka T, Taniguchi M, Fujinami RS (2009) Contrasting roles for V $\alpha$ 14<sup>+</sup> natural killer T cells in a viral model for multiple sclerosis. *J Neurovirol* 15:90-98
4. Martinez NE, Sato F, Kawai E, Omura S, Takahashi S, Yoh K, Tsunoda I (2015) Th17-biased ROR $\gamma$ t transgenic mice become susceptible to a viral model for multiple sclerosis. *Brain Behav Immun* 43:86-97
5. Sato F, Kawai E, Martinez NE, Omura S, Park A-M, Takahashi S, Yoh K, Tsunoda I (2017) T-bet, but not Gata3, overexpression is detrimental in a neurotropic viral infection. *Sci Rep* 7:10496
6. Tsunoda I, Tanaka T, Fujinami RS (2008) Regulatory role of CD1d in neurotropic virus infection. *J Virol* 82:10279-10289
7. Fernando V, Omura S, Sato F, Kawai E, Martinez NE, Elliott SF, Yoh K, Takahashi S, Tsunoda I (2014) Regulation of an autoimmune model for multiple sclerosis in Th2-biased GATA3 transgenic mice. *Int J Mol Sci* 15:1700-1718
8. Aharoni R, Teitelbaum D, Leitner O, Meshorer A, Sela M, Arnon R (2000) Specific Th2 cells accumulate in the central nervous system of mice protected against experimental autoimmune encephalomyelitis by copolymer 1. *Proc Natl Acad Sci U S A* 97:11472-11477
9. Kawai E, Sato F, Omura S, Martinez NE, Reddy PC, Taniguchi M, Tsunoda I (2015) Organ-specific protective role of NKT cells in virus-induced inflammatory demyelination and myocarditis depends on mouse strain. *J Neuroimmunol* 278:174-184
10. Bomprezzi R, Schafer R, Reese V, Misra A, Vollmer TL, Kala M (2011) Glatiramer acetate-specific antibody titres in patients with relapsing / remitting multiple sclerosis and in experimental autoimmune encephalomyelitis. *Scand J Immunol* 74:219-226
11. Omura S, Kawai E, Sato F, Martinez NE, Chaitanya GV, Rollyson PA, Cvek U, Trutschl M, Alexander JS, Tsunoda I (2014) Bioinformatics multivariate analysis determined a set of phase-specific biomarker candidates in a novel mouse model for viral myocarditis. *Circ Cardiovasc Genet* 7:444-454
12. Guiton R, Vasseur V, Charron S, Torres Arias M, Van Langendonck N, Buzoni-Gatel D, Ryffel B, Dimier-Poisson I (2010) Interleukin 17 receptor signaling is deleterious during *Toxoplasma gondii* infection in susceptible BL6 mice. *J Infect Dis* 202:427-435
